# Supplementary material for: Attenuated Structural Transformation of Aconitine during Sand Frying Process and Antiarrhythmic Effect of Its Converted Products
Source: PubMed Central journal article supplement (PMC8560236; doi:10.1155/2021/7243052), 2021-10-25
Supplement: 7243052.f1.pdf [file 7243052.f1.pdf]

## **Supplementary Materials for**

# **Attenuated Structural Transformation of Aconitine During Sand Frying Process and Anti-arrhythmic Effect of Its Converted Products**

Yu-Jie Wang,<sup>1</sup> Pei Tao,<sup>2</sup> and Yan Wang<sup>2</sup>

<sup>1</sup> School of Ethnic Medicine, Chengdu University of Traditional Chinese Medicine, Chengdu 611137, China.

<sup>2</sup> School of Pharmacy, Chengdu University of Traditional Chinese Medicine, Chengdu 611137, China.

Correspondence should be addressed to Yu-Jie Wang; [superwangyj@126.com](mailto:superwangyj@126.com)

### **This PDF file includes:**

Figures S1 to S28

## Content

|                                                                                   |           |
|-----------------------------------------------------------------------------------|-----------|
| <b>1.1 Structure elucidation of pyroaconitine (compound 1)</b> .....              | <b>3</b>  |
| <sup>1</sup> H NMR of pyroaconitine .....                                         | 3         |
| <sup>13</sup> C NMR of pyroaconitine.....                                         | 5         |
| Key HSQC correlations of pyroaconitine .....                                      | 6         |
| Key HMBC correlations of pyroaconitine.....                                       | 8         |
| Key <sup>1</sup> H- <sup>1</sup> H COSY correlations of pyroaconitine.....        | 11        |
| Key NOESY correlations of pyroaconitine.....                                      | 13        |
| High-resolution ESI-MS of pyroaconitine .....                                     | 14        |
| <b>1.2 Structure elucidation of 16-epi-pyroaconitine (compound 2)</b> .....       | <b>15</b> |
| <sup>1</sup> H NMR of 16-epi-pyroaconitine.....                                   | 15        |
| <sup>13</sup> C NMR of 16-epi-pyroaconitine.....                                  | 18        |
| Key HSQC correlations of 16-epi-pyroaconitine.....                                | 19        |
| Key HMBC correlations of 16-epi-pyroaconitine.....                                | 22        |
| Key <sup>1</sup> H- <sup>1</sup> H COSY correlations of 16-epi-pyroaconitine..... | 26        |
| Key NOESY correlations of 16-epi-pyroaconitine.....                               | 27        |
| High-resolution ESI-MS of 16-epi-pyroaconitine.....                               | 29        |
| <b>1.3 Purity test results of compounds 1 and 2</b> .....                         | <b>30</b> |



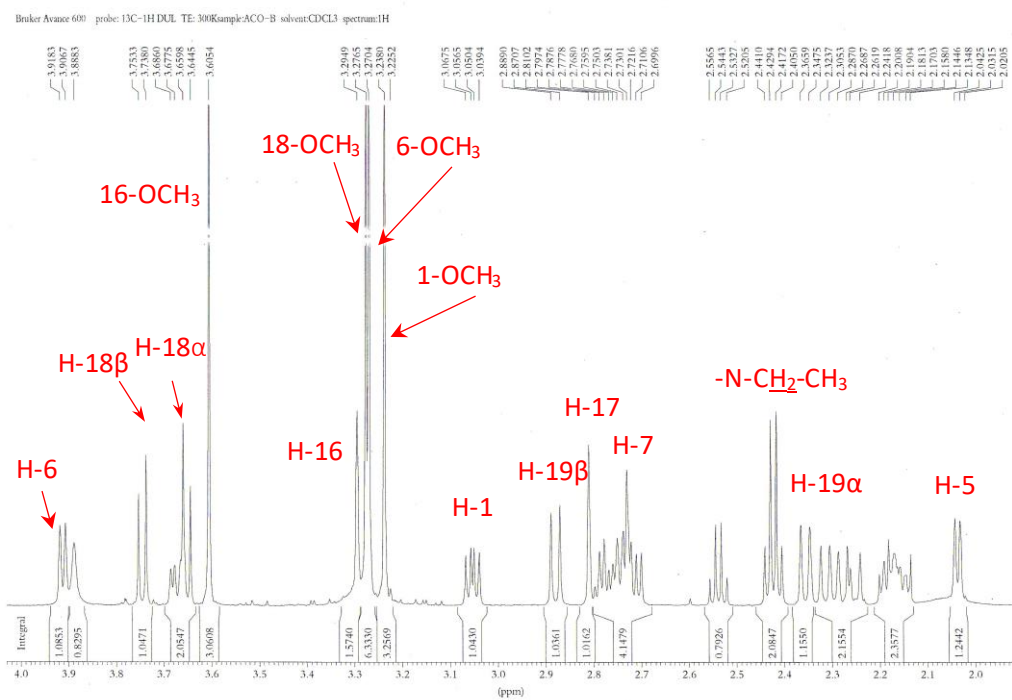

Figure S2. <sup>1</sup>H NMR of pyroaconitine (Detail)

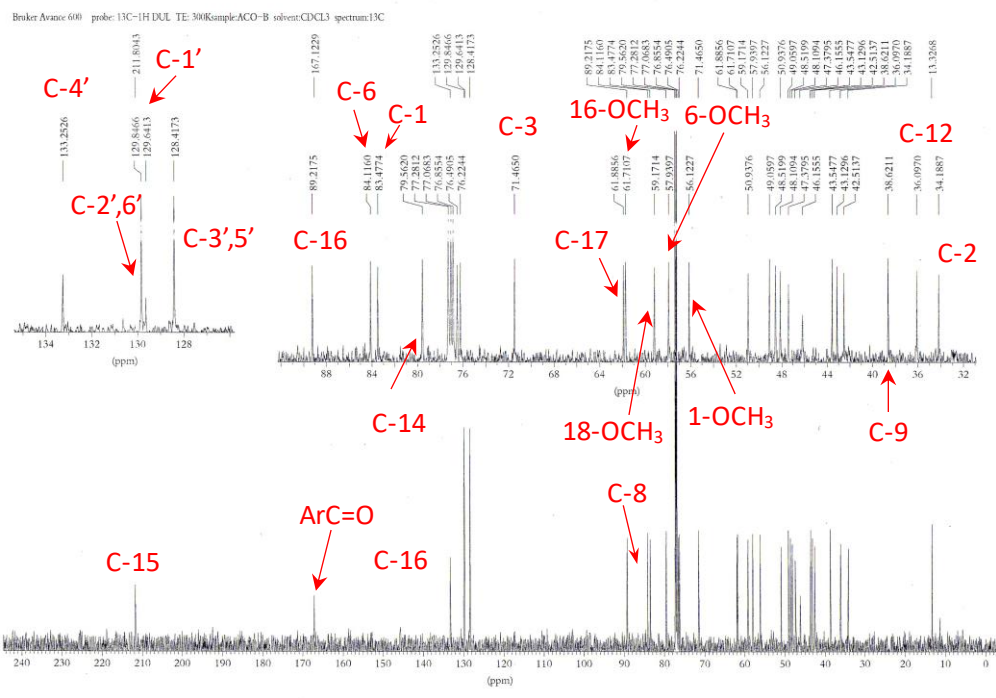

Figure S3. <sup>13</sup>C NMR of pyroaconitine

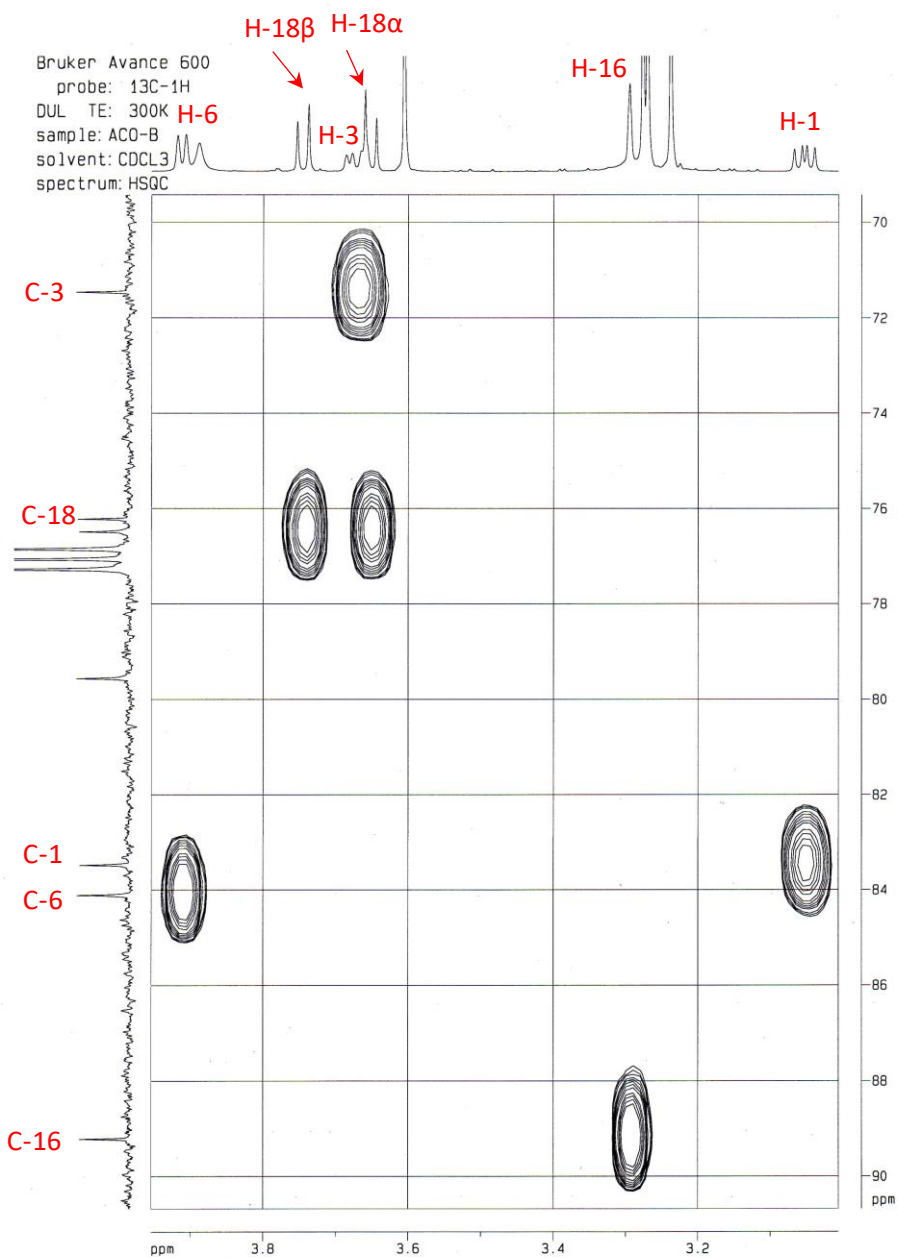

Figure S4. Key HSQC correlations of pyroaconitine (Detail 1)

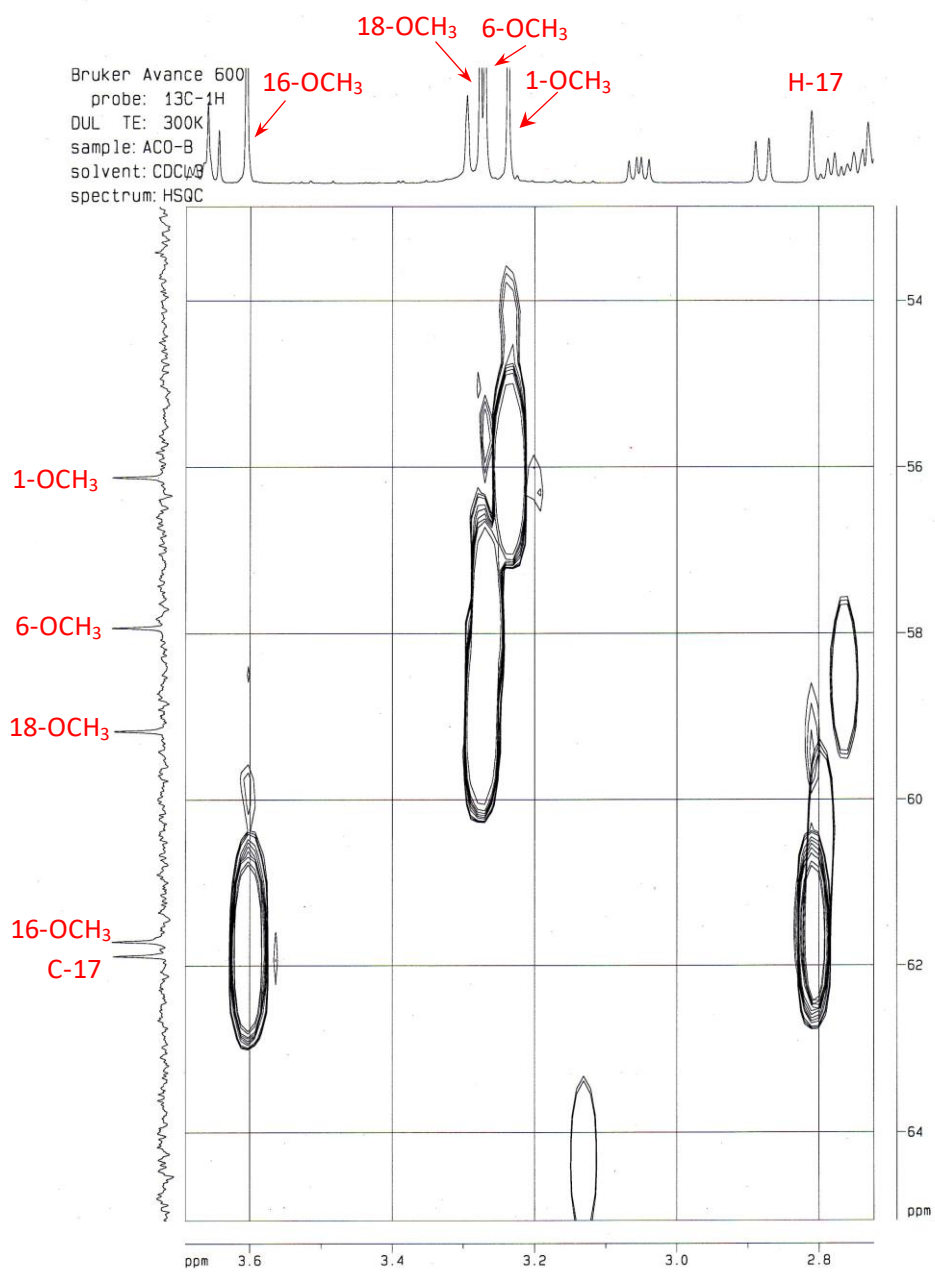

Figure S5. Key HSQC correlations of pyroaconitine (Detail 2)

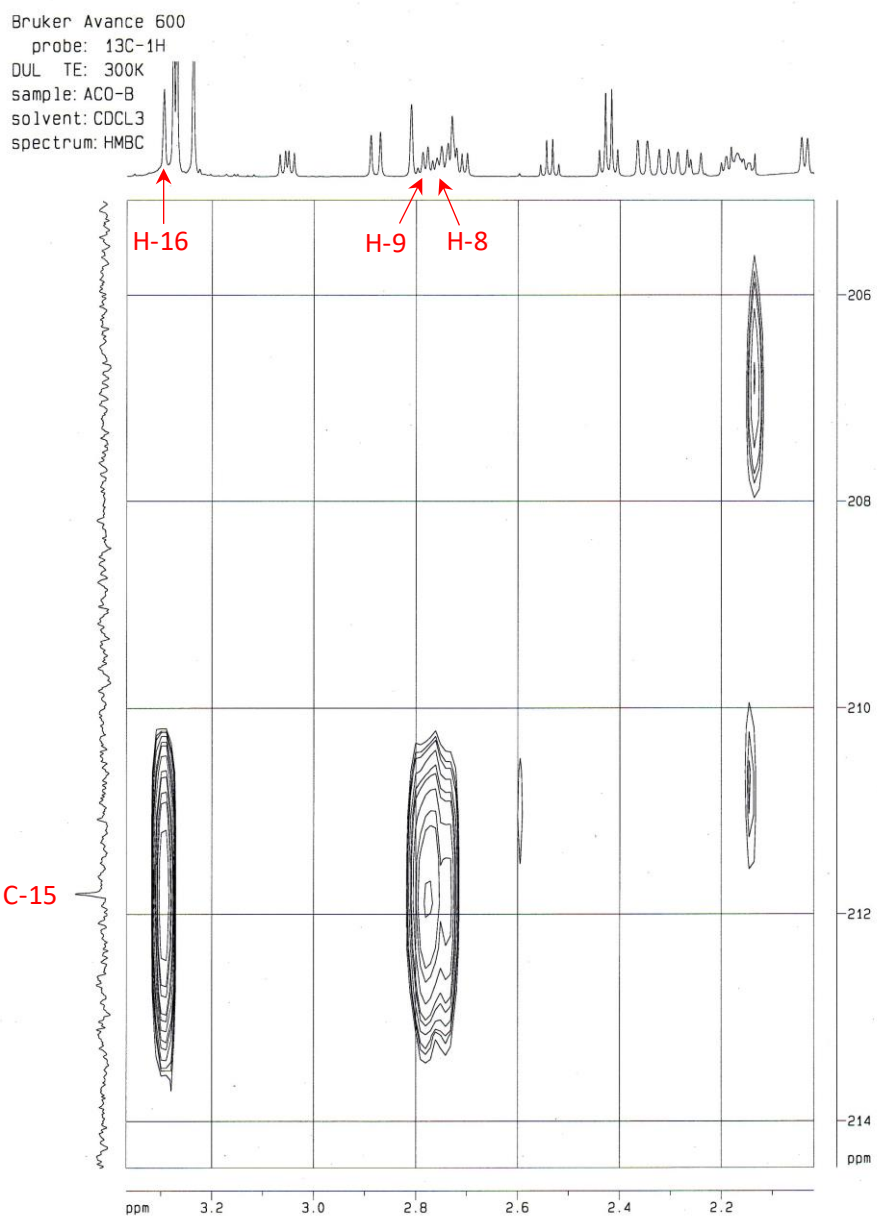

Figure S6. Key HMBC correlations of pyroaconitine (Detail 1)



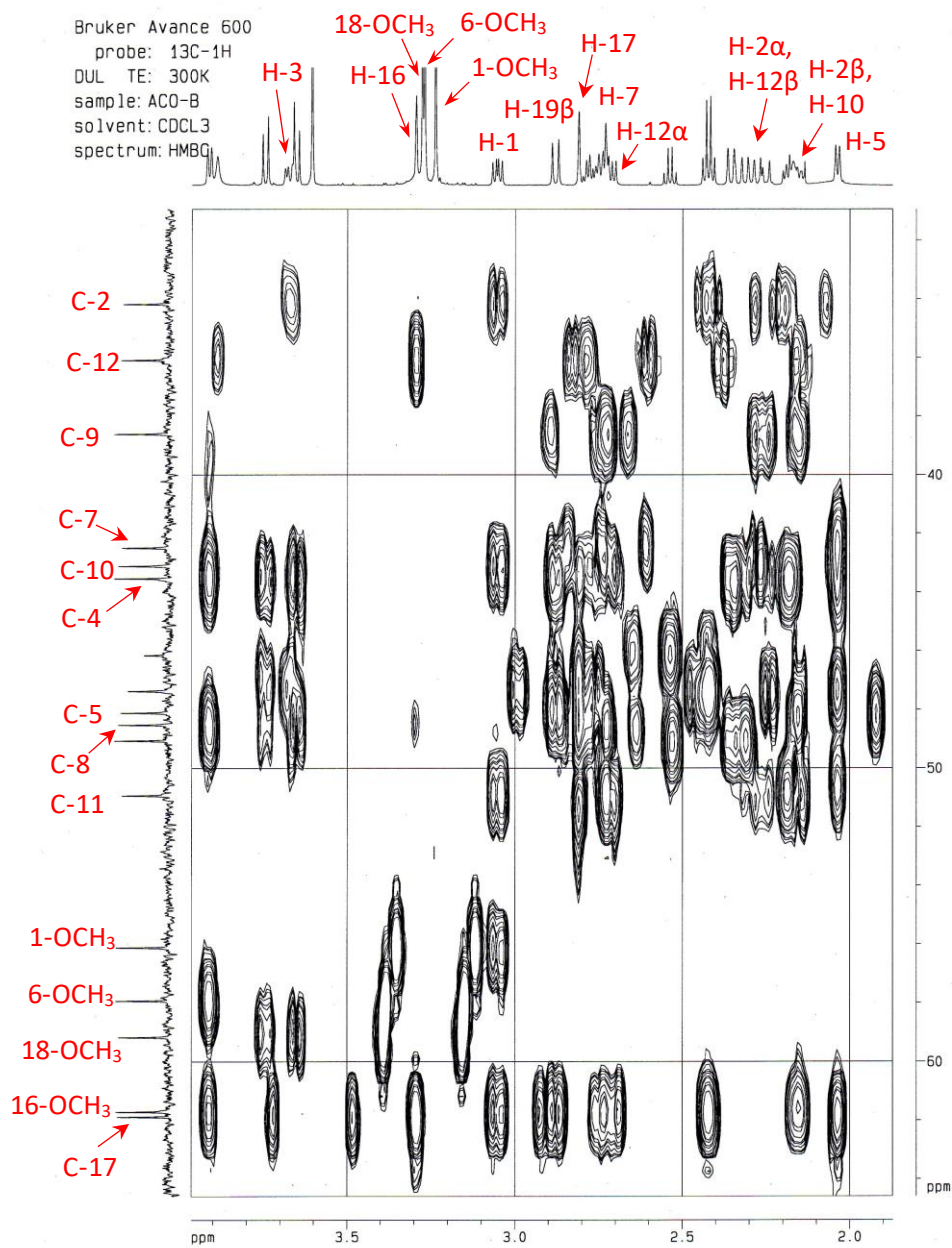

Figure S7. Key HMBC correlations of pyraconitine (Detail 2)

Bruker Avance 600  
probe:  $^{13}\text{C}$ -1H  
DUL TE: 300K  
sample: ACO-B  
solvent:  $\text{CDCl}_3$   
spectrum: HMBC

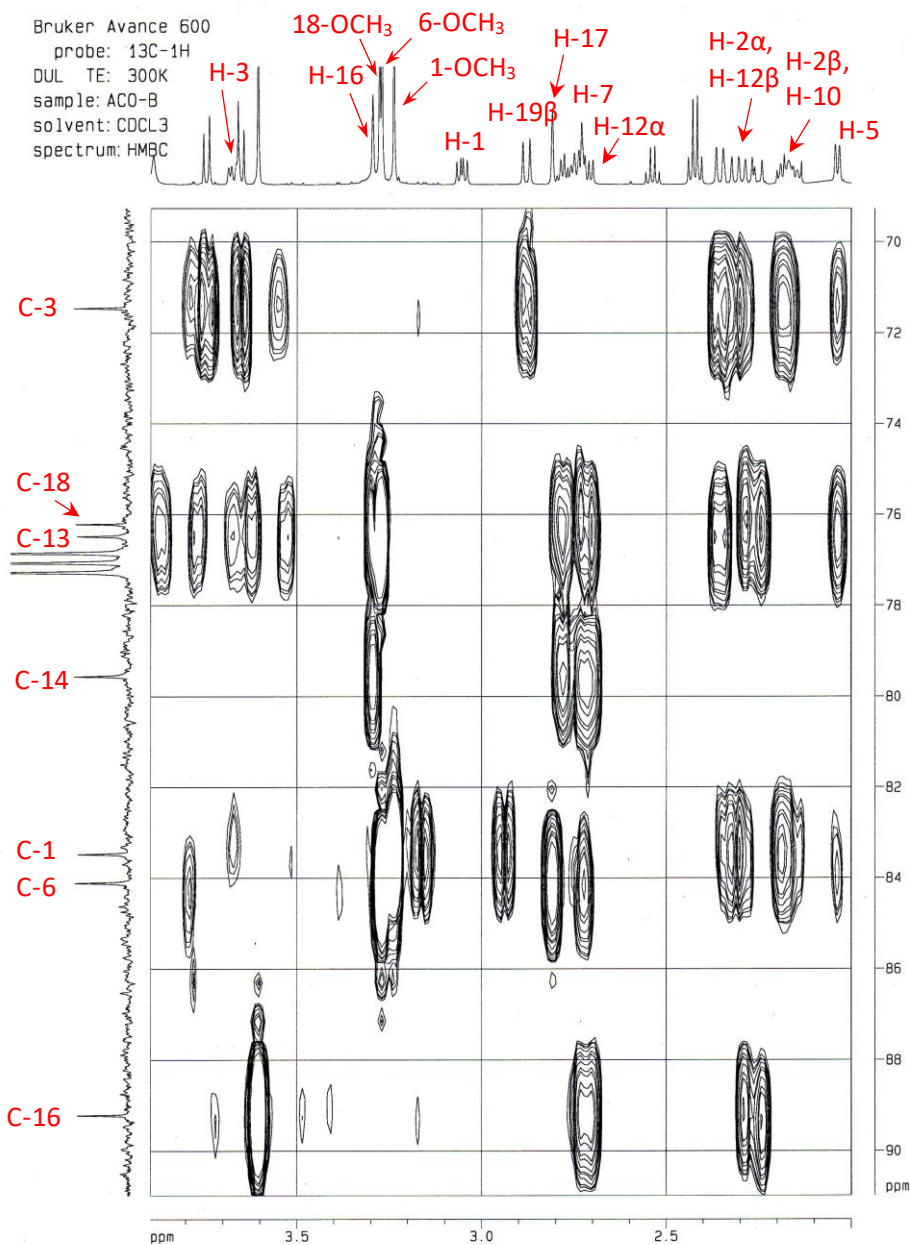

Figure S8. Key HMBC correlations of pyraconitine (Detail 3)

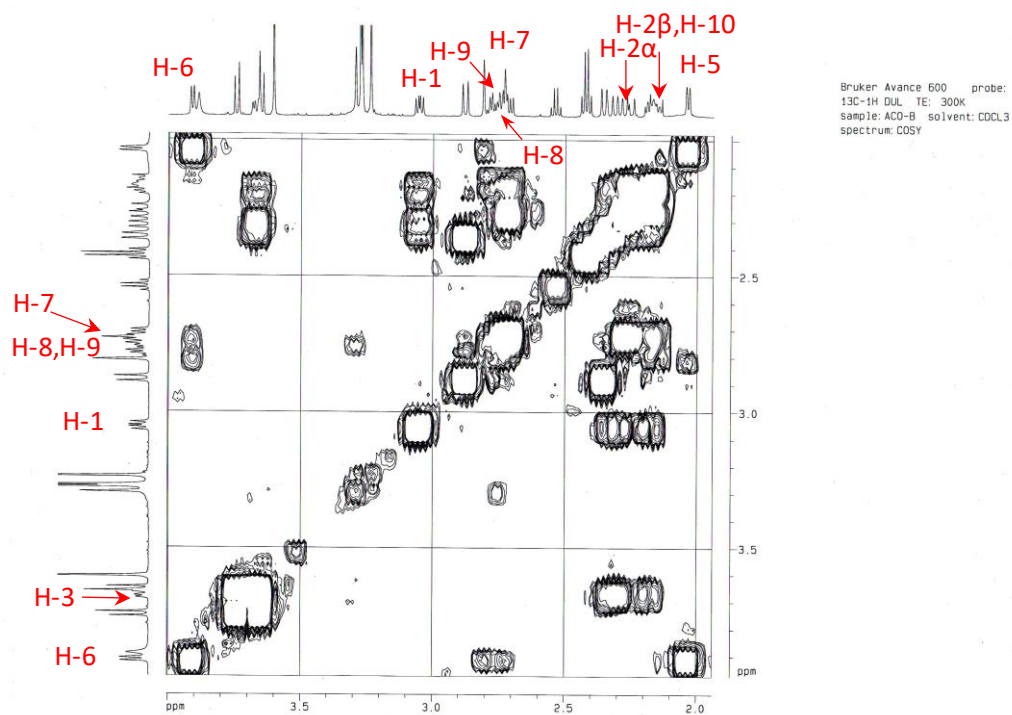

Figure S9. Key  $^1\text{H}$ - $^1\text{H}$  COSY correlations of pyroaconitine (Detail 1)

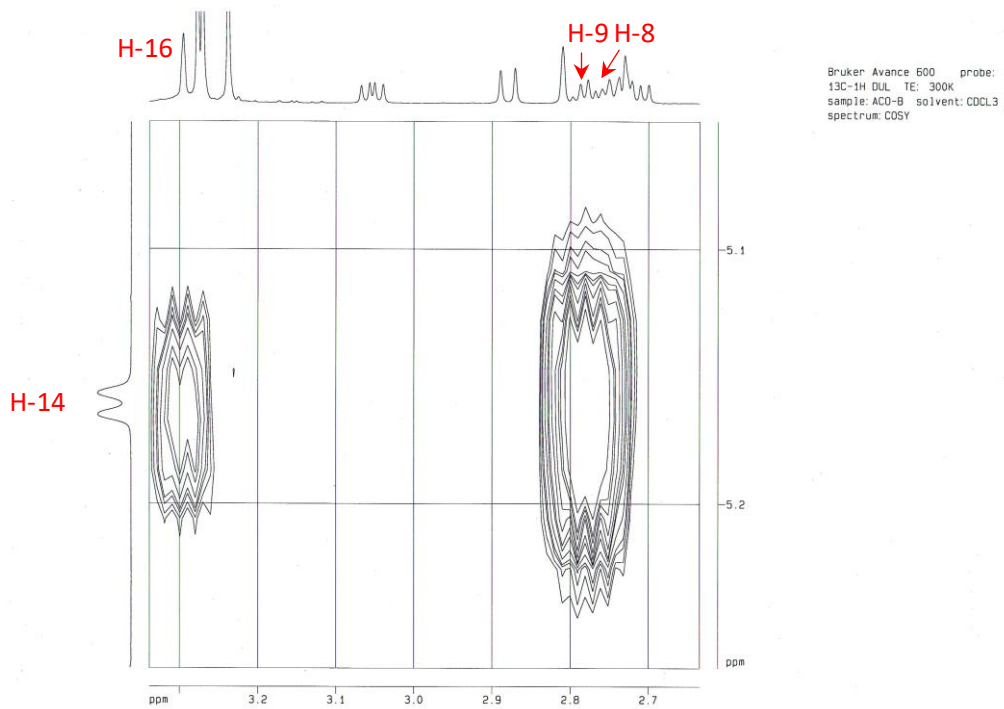

Figure S10. Key  $^1\text{H}$ - $^1\text{H}$  COSY correlations of pyroaconitine (Detail 2)

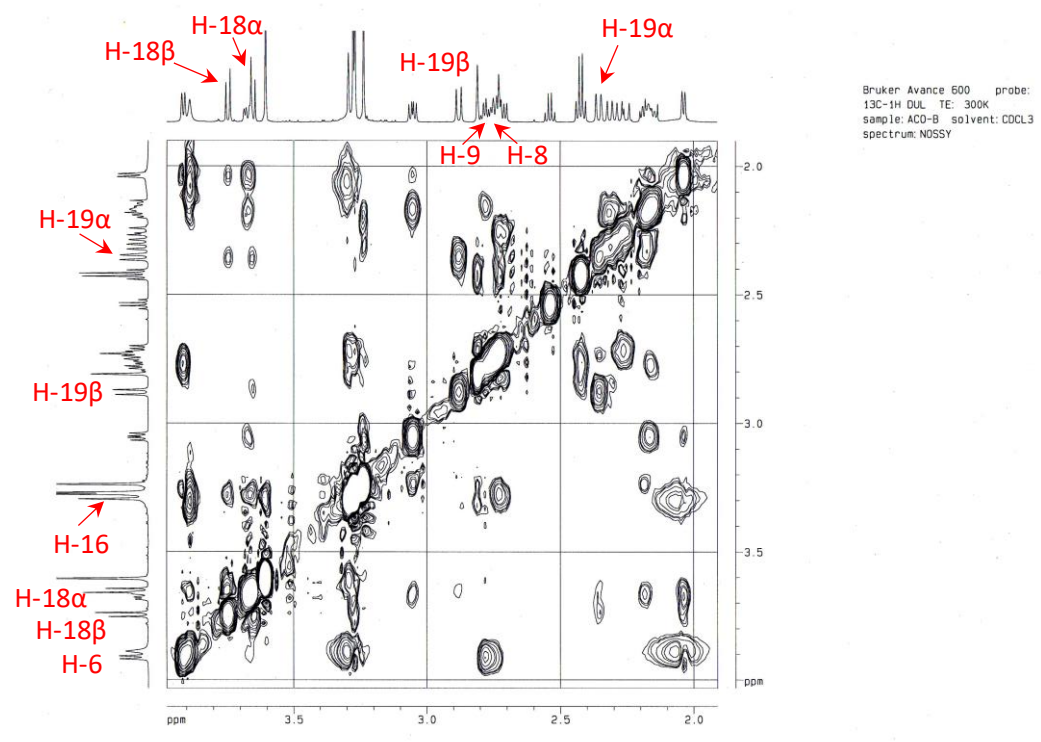

Figure S11. Key NOESY correlations of pyroaconitine (Detail 1)

## Mass Spectrum SmartFormula Report

### Analysis Info

Method tune\_low\_NEW.m  
Sample Name ACO-B  
Comment

Operator Ma  
Instrument / Ser# micrOTOF-Q II 10203

### Acquisition Parameter

|             |            |                       |           |                  |           |
|-------------|------------|-----------------------|-----------|------------------|-----------|
| Source Type | ESI        | Ion Polarity          | Positive  | Set Nebulizer    | 0.8 Bar   |
| Focus       | Not active | Set Capillary         | 4500 V    | Set Dry Heater   | 180 °C    |
| Scan Begin  | 50 m/z     | Set End Plate Offset  | -500 V    | Set Dry Gas      | 6.0 l/min |
| Scan End    | 1500 m/z   | Set Collision Cell RF | 150.0 Vpp | Set Divert Valve | Source    |

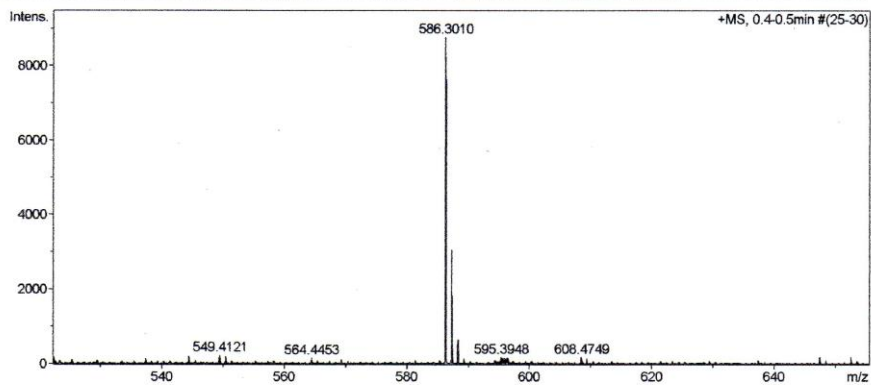

| Meas. m/z | Formula                                                       | m/z      | err  [ppm] | mSigma | N-Rule | e <sup>-</sup> Conf |
|-----------|---------------------------------------------------------------|----------|------------|--------|--------|---------------------|
| 586.3010  | C <sub>32</sub> H <sub>44</sub> N <sub>2</sub> O <sub>9</sub> | 586.3011 | 0.2        | 4.92   | ok     | even                |

Figure S12. High-resolution ESI-MS of pyroaconitine



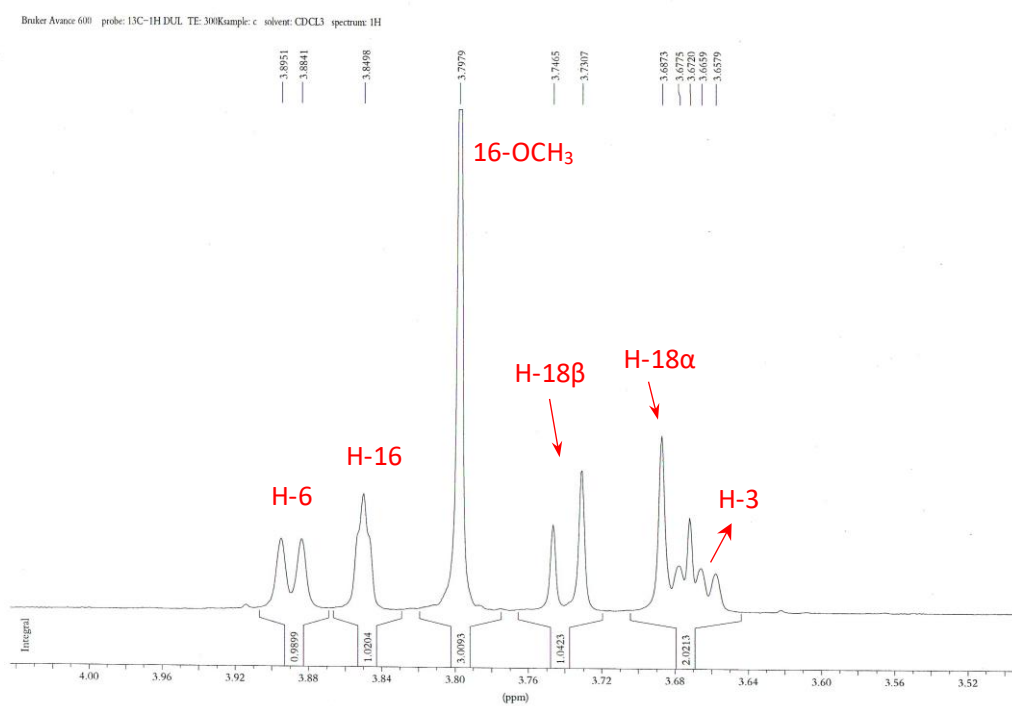

Figure S14. <sup>1</sup>H NMR of 16-epi-pyroaconitine (Detail 1)



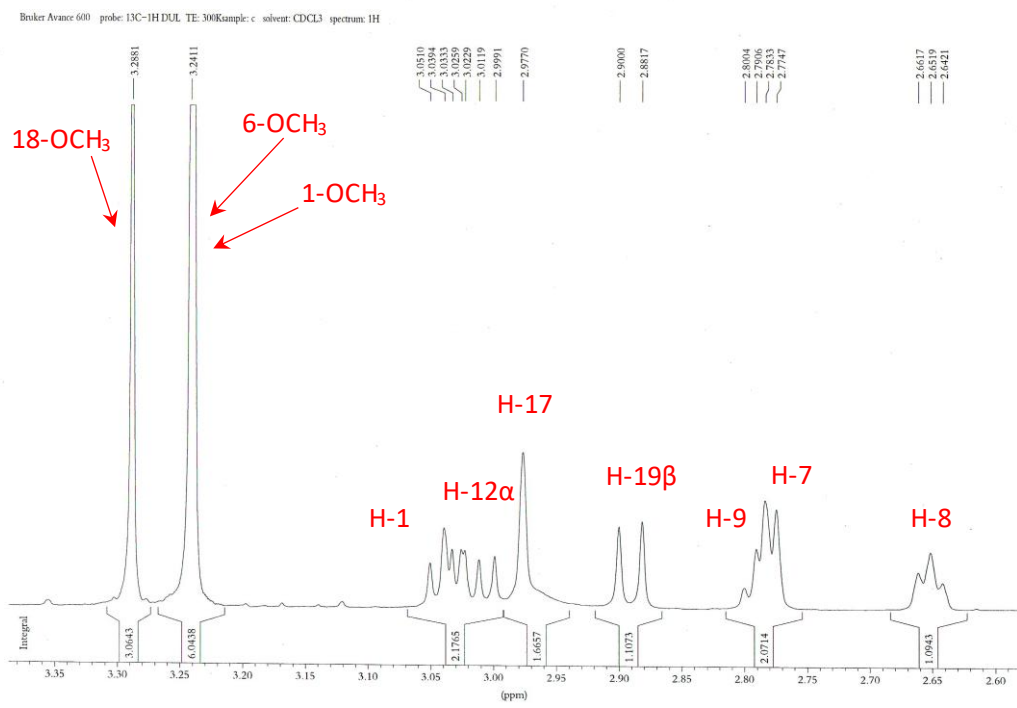

Figure S15. <sup>1</sup>H NMR of 16-epi-pyraconitine (Detail 2)

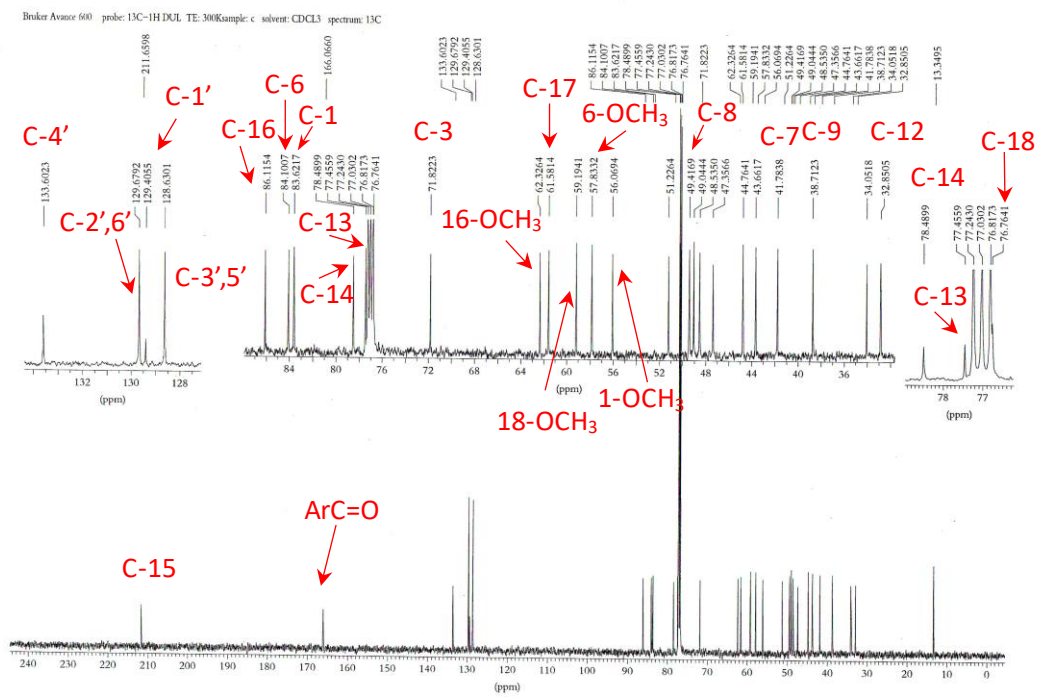

Figure S16. <sup>13</sup>C NMR of 16-epi-pyroaconitine

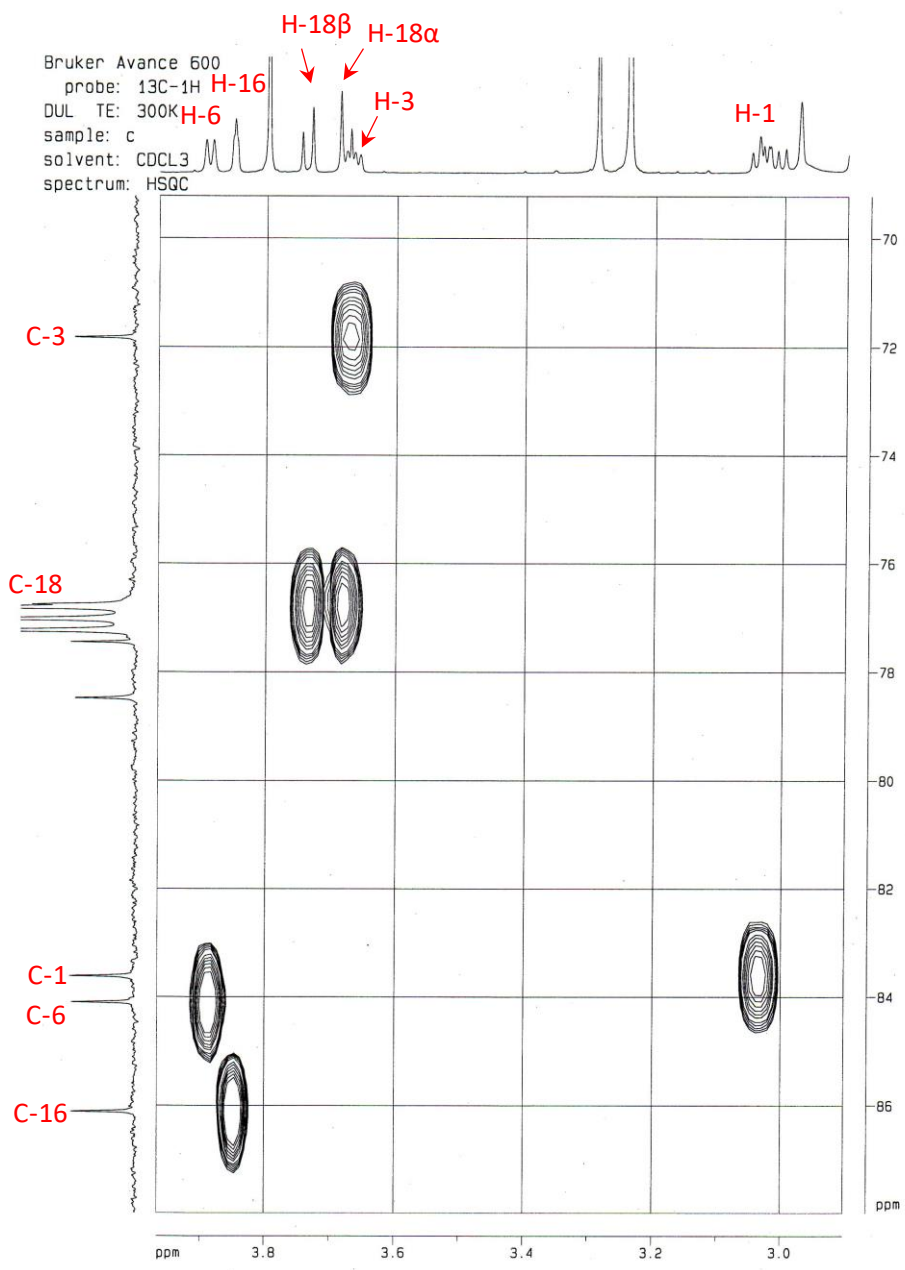

Figure S17. Key HSQC correlations of 16-epi-pyroaconitine (Detail 1)

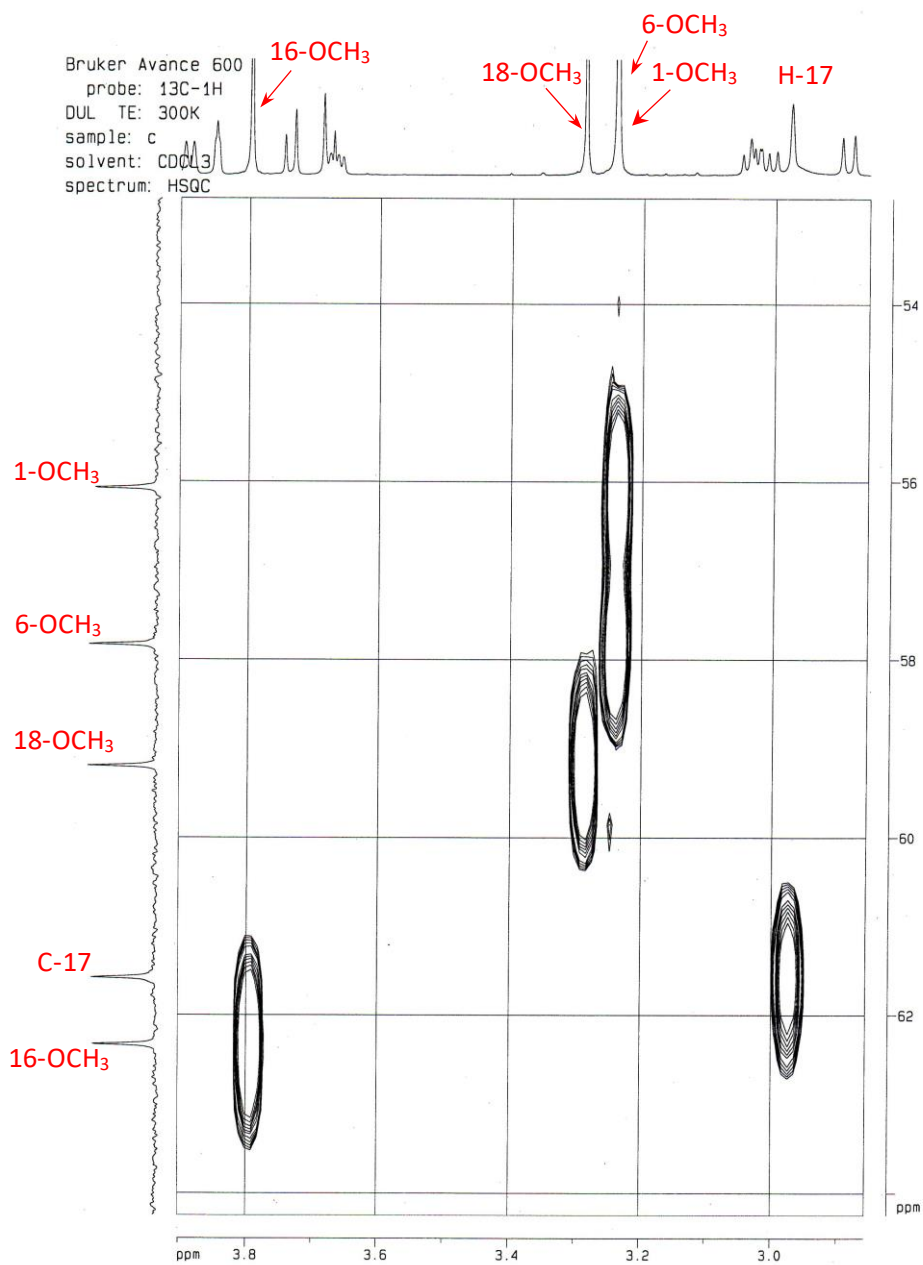

Figure S18. Key HSQC correlations of 16-epi-pyroaconitine (Detail 2)

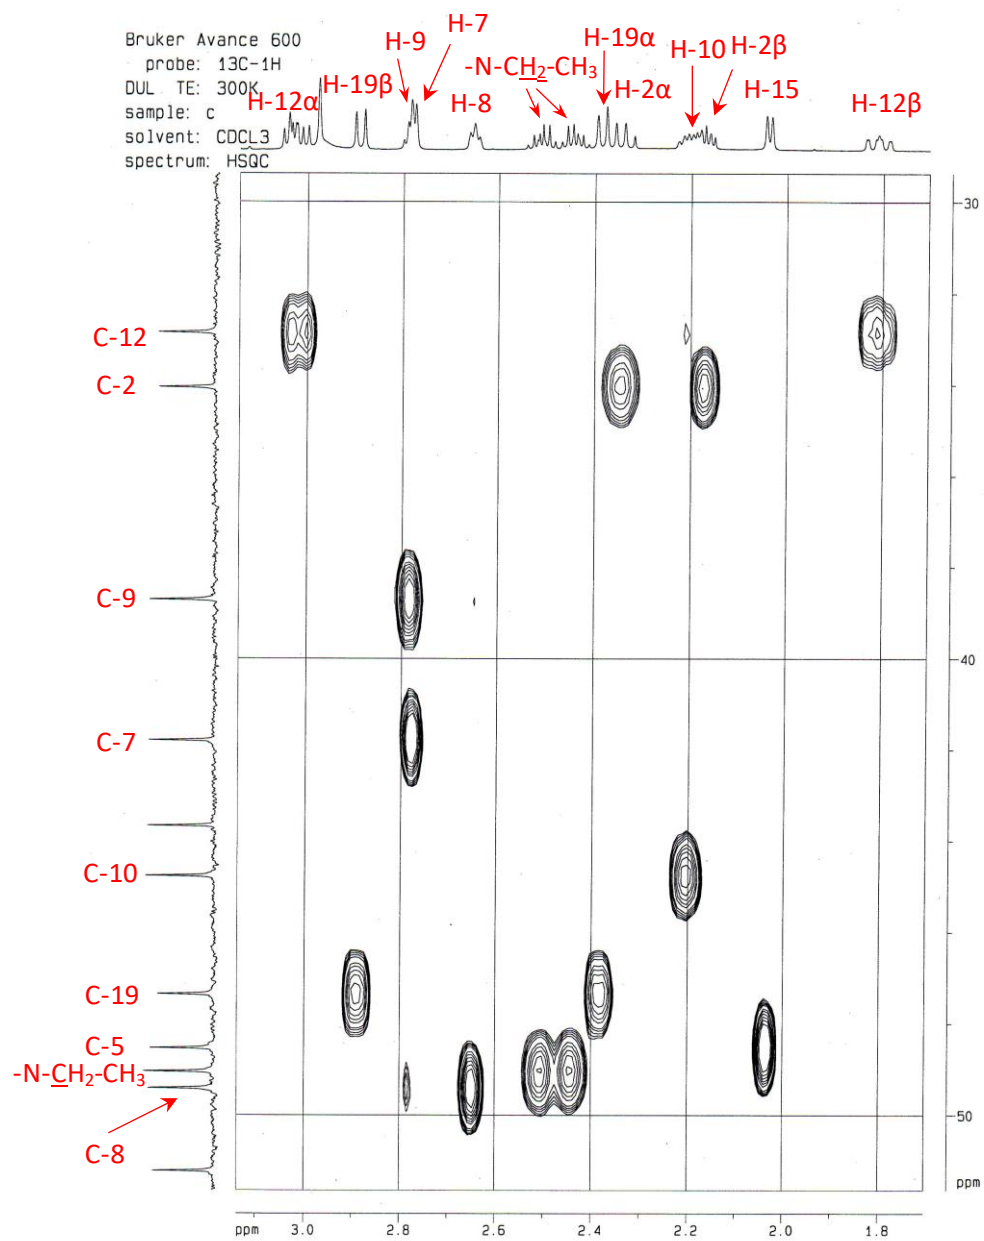

Figure S19. Key HSQC correlations of 16-epi-pyroaconitine (Detail 3)

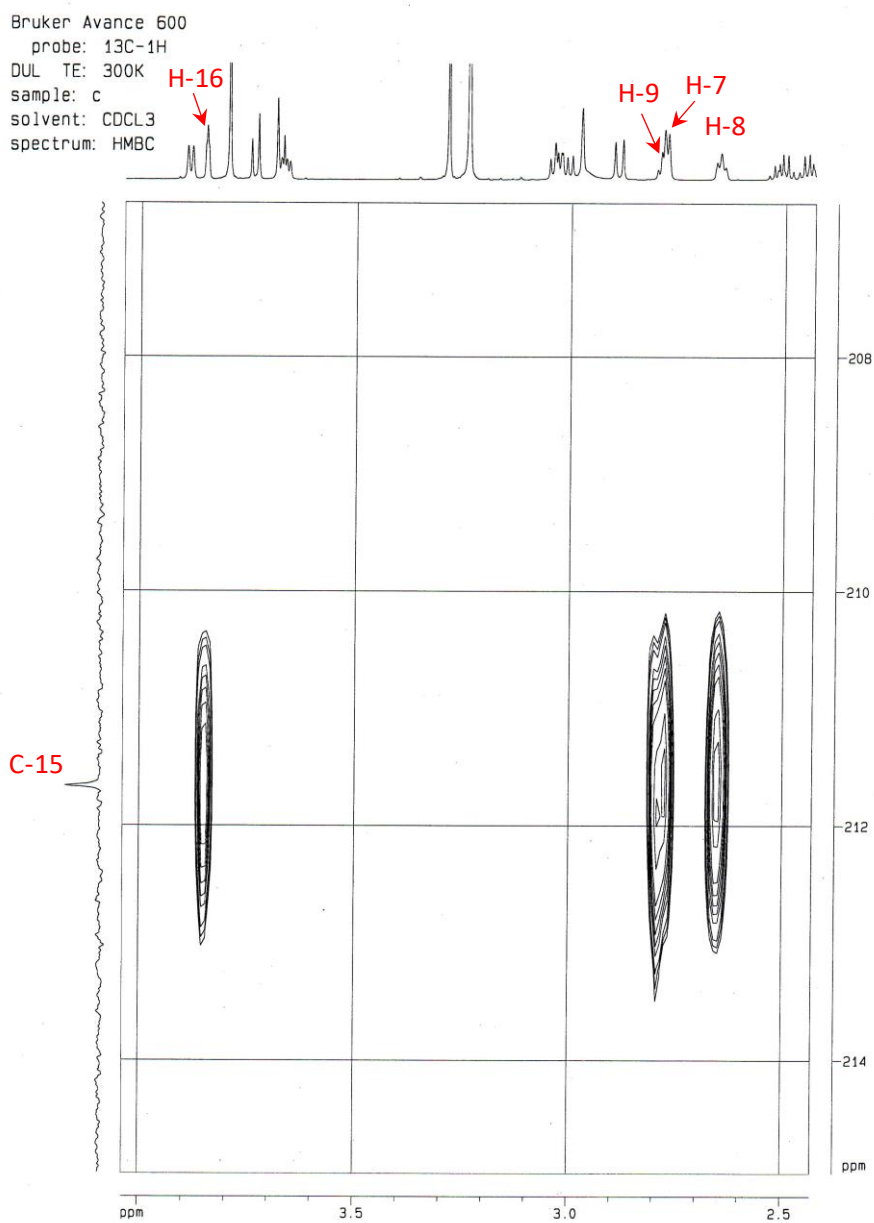

Figure S20. Key HMBC correlations of 16-epi-pyraconitine (Detail 1)

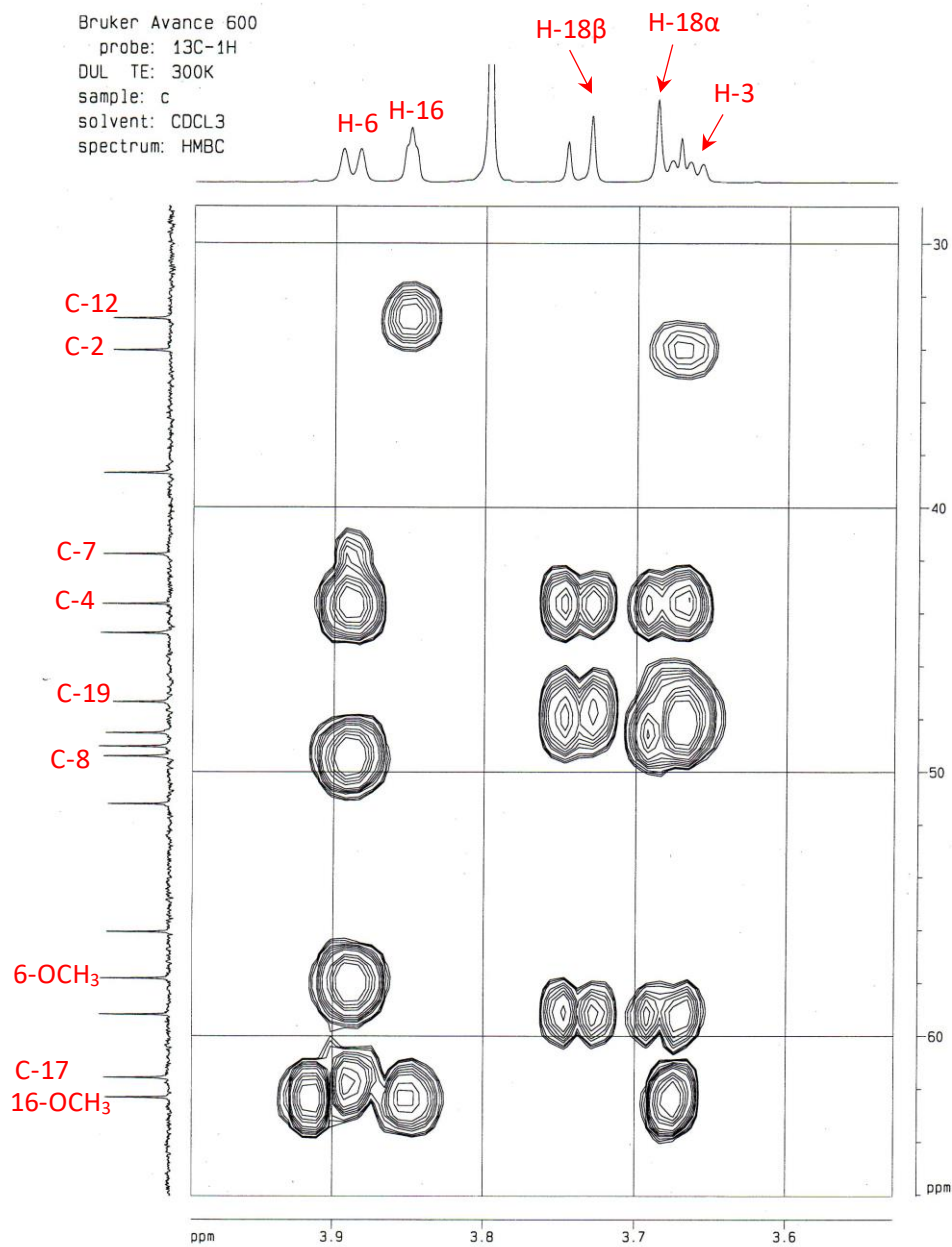

Figure S21. Key HMBC correlations of 16-epi-pyroaconitine (Detail 2)

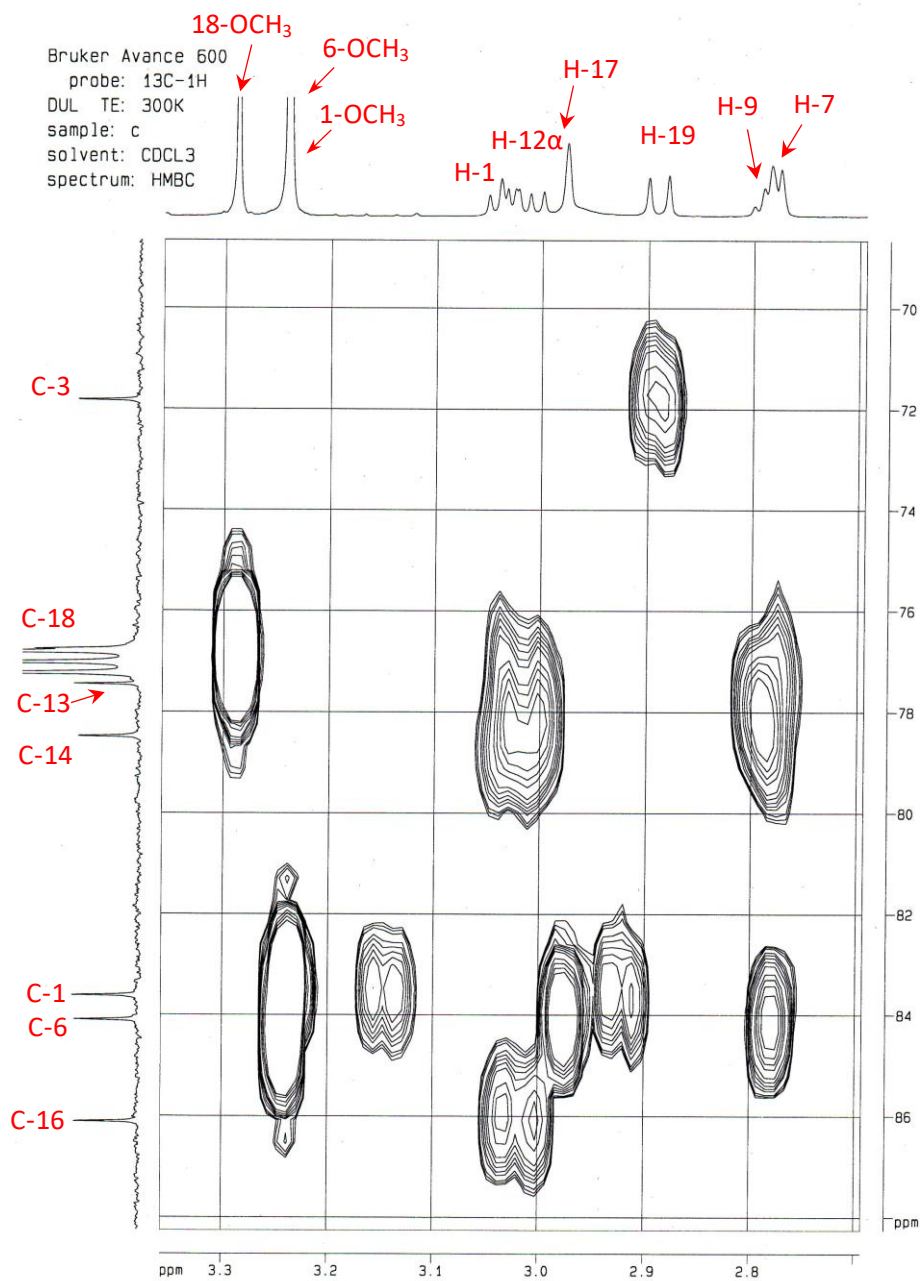

Figure S22. Key HMBC correlations of 16-epi-pyraconitine (Detail 3)



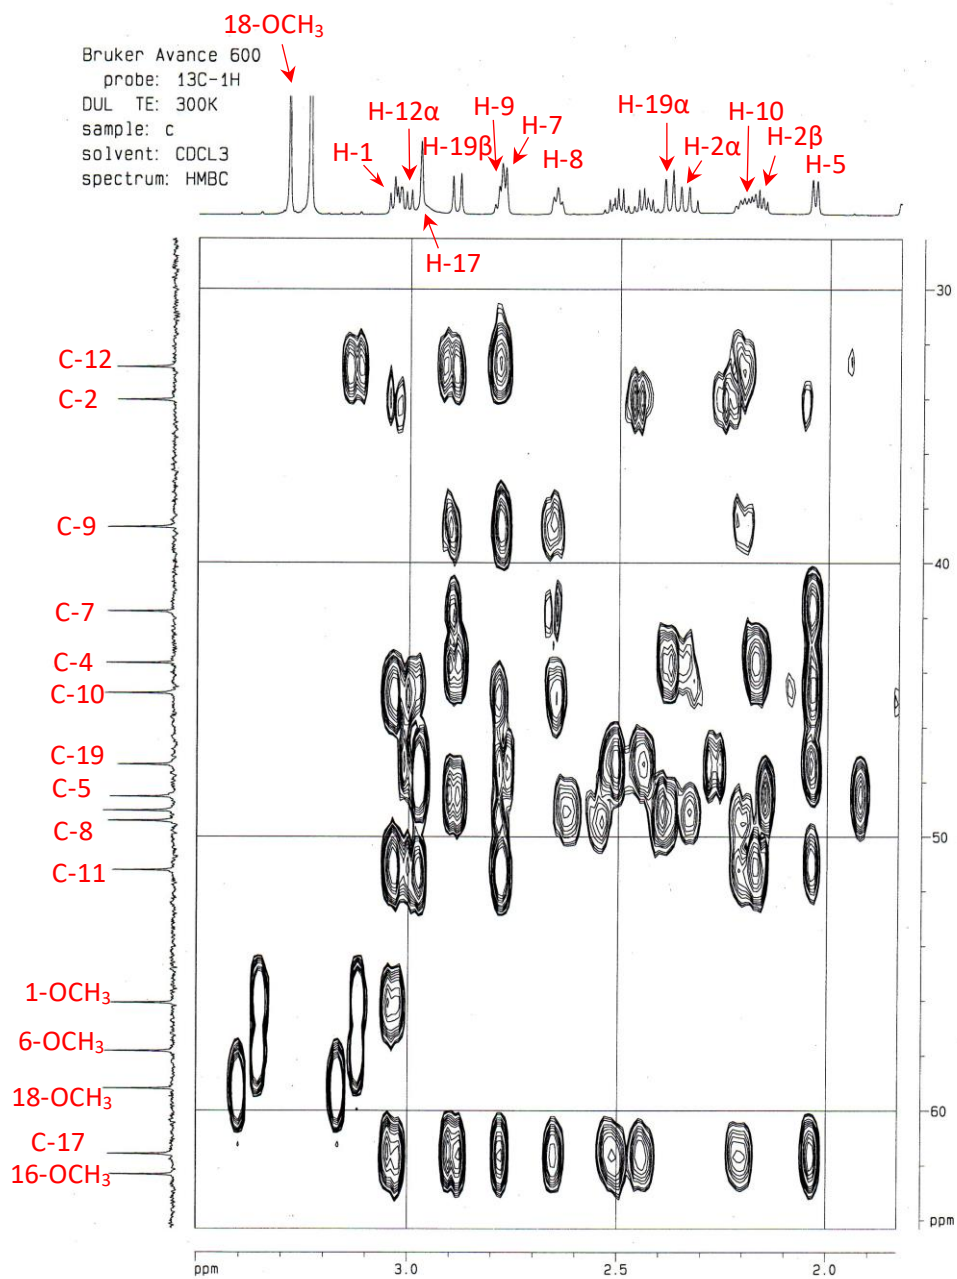

Figure S23. Key HMBC correlations of 16-epi-pyroaconitine (Detail 4)

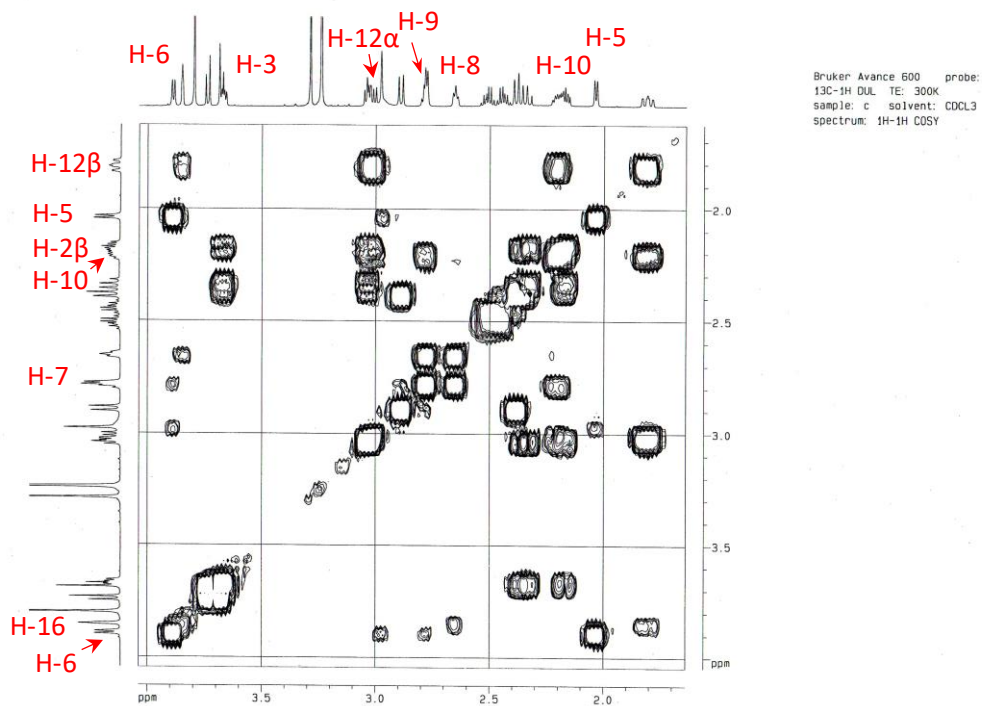

Figure S24. Key  $^1\text{H}$ - $^1\text{H}$  COSY correlations of 16-epi-pyroaconitine (Detail 1)

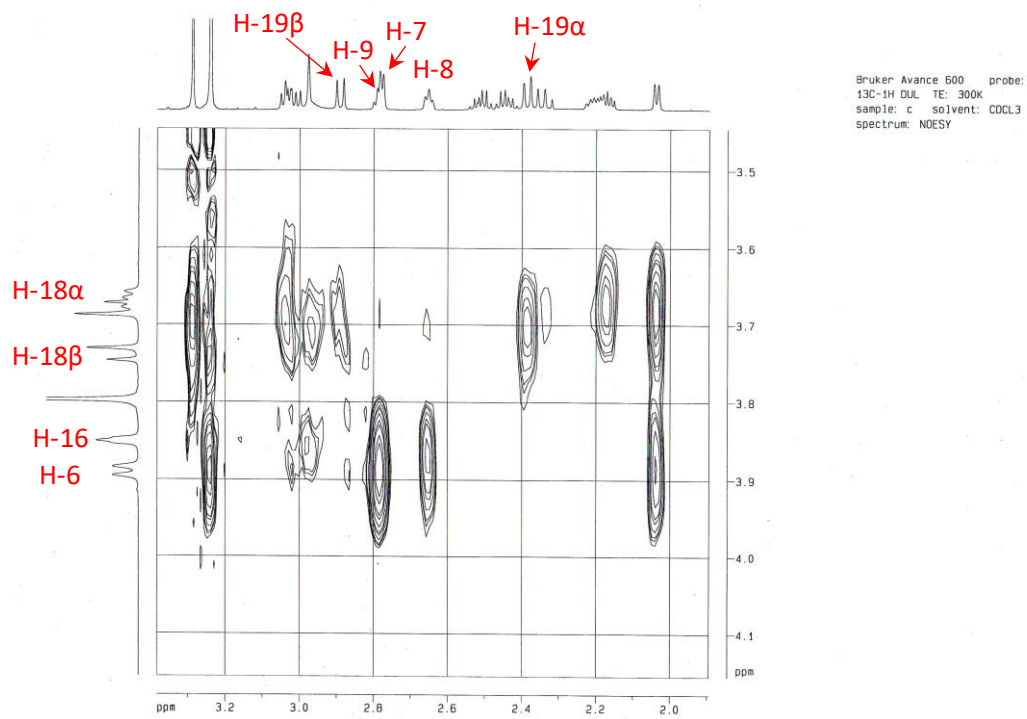

Figure S25. Key NOESY correlations of 16-epi-pyroaconitine (Detail 1)

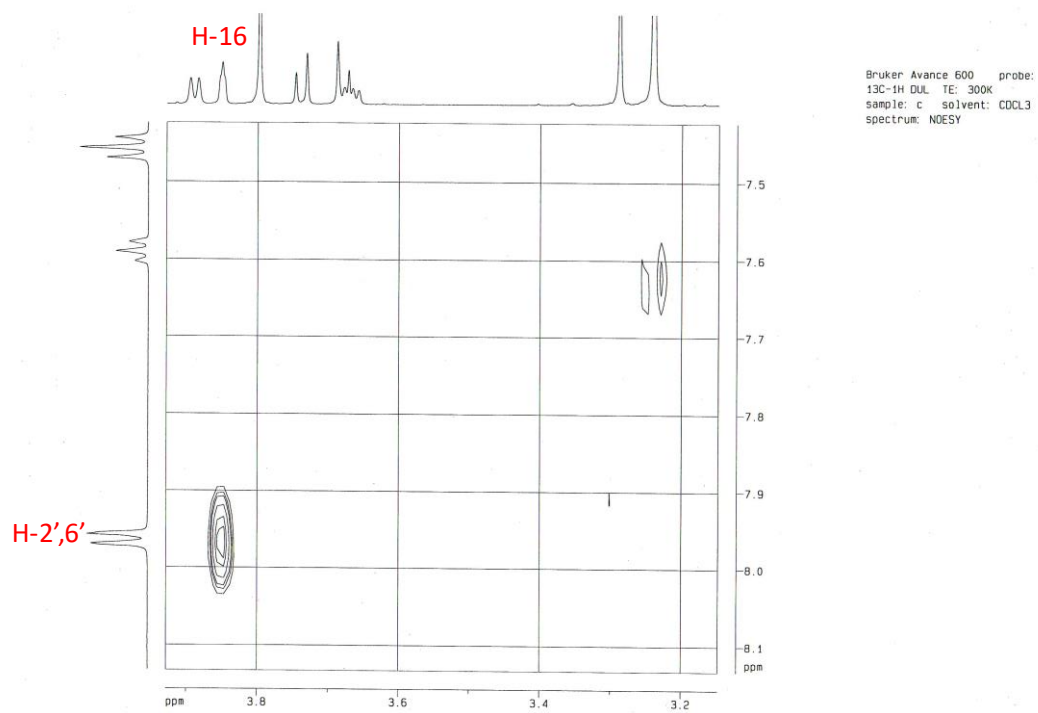

Figure S26. Key NOESY correlations of 16-epi-pyroaconitine (Detail 2)

# Mass Spectrum SmartFormula Report

## Analysis Info

Analysis Name D:\Data\USER-2016\WYJ-C.d  
Method tune\_low\_NEW.m  
Sample Name WYJ-C  
Comment

Acquisition Date 5/31/2016 4:23:53 PM

Operator Ma  
Instrument / Ser# micrOTOF-Q II 10203

## Acquisition Parameter

|             |            |                       |           |                  |           |
|-------------|------------|-----------------------|-----------|------------------|-----------|
| Source Type | ESI        | Ion Polarity          | Positive  | Set Nebulizer    | 0.3 Bar   |
| Focus       | Not active | Set Capillary         | 4500 V    | Set Dry Heater   | 180 °C    |
| Scan Begin  | 50 m/z     | Set End Plate Offset  | -500 V    | Set Dry Gas      | 4.0 l/min |
| Scan End    | 1500 m/z   | Set Collision Cell RF | 150.0 Vpp | Set Divert Valve | Source    |

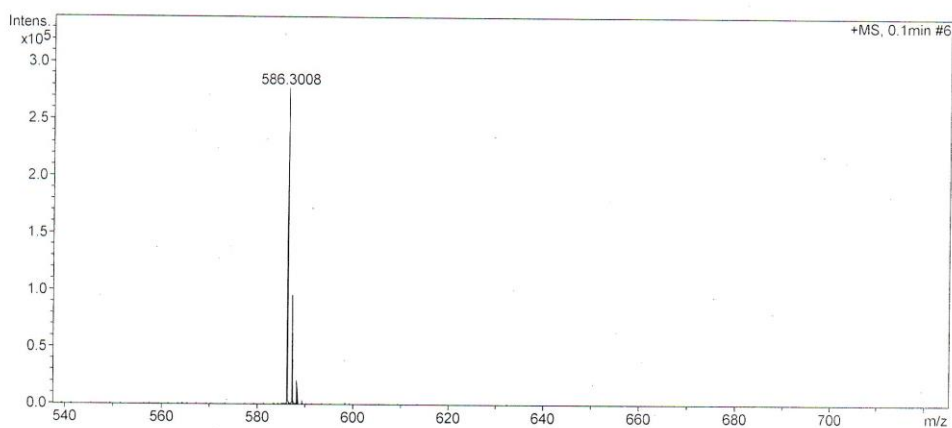

| Meas. m/z | Formula            | m/z      | err [ppm] | mSigma | N-Rule | e <sup>-</sup> Conf |
|-----------|--------------------|----------|-----------|--------|--------|---------------------|
| 586.3008  |                    |          |           |        |        |                     |
|           | C 32 H 44 N O 9    | 586.3011 | 0.5       | 4.62   | ok     | even                |
|           | C 29 H 36 N 11 O 3 | 586.2997 | -1.8      | 7.69   | ok     | even                |
|           | C 28 H 40 N 7 O 7  | 586.2984 | -4.1      | 7.83   | ok     | even                |
|           | C 33 H 40 N 5 O 5  | 586.3024 | 2.8       | 17.00  | ok     | even                |

Figure S27. High-resolution ESI-MS of 16-epi-pyroaconitine.

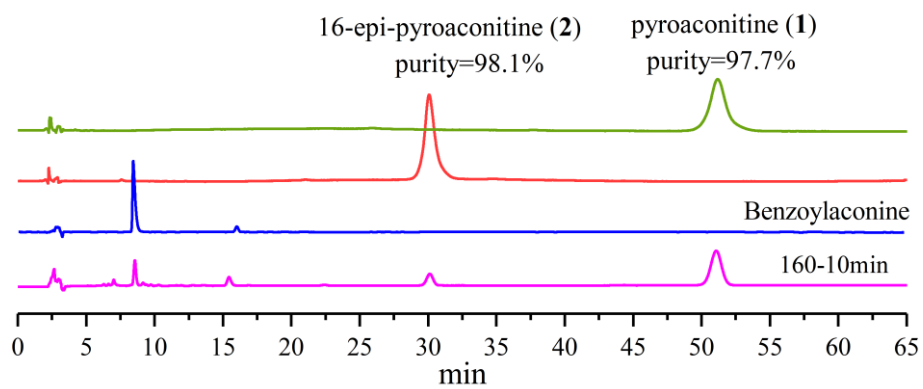

Figure S28. Purity test results of compounds 1 and 2.
